# Supplementary material
Source: PubMed Central journal article supplement (PMC2993349)
Supplement: 1007152107_pnas.201007152SI.pdf [file 1007152107_pnas.201007152SI.pdf]

# Supporting Information

Kranzusch et al. 10.1073/pnas.1007152107

## SI Methods

**Protein Expression and Purification.** Machupo virus cDNA (accession no. AY619642-3) was chemically synthesized (GeneArt). The *L* gene ORF was cloned with a C-terminal FLAG and 6× His tag (GGDYKDDDDKGGHHHHHH) into pFastBac Dual (Invitrogen) under the polyhedrin promoter. Mutant L SDD1328AAA was generated by QuikChange site-directed mutagenesis (Stratagene). Baculovirus was recovered by using the Bac-to-Bac system (Invitrogen), and individual plaque-purified clones were screened for optimal protein expression. Sf21 cells infected at an MOI of 1 were harvested 65 h post infection, and L was purified by Ni-affinity and ion exchange chromatography (GE Healthcare). Peak protein fractions were analyzed by 10% denaturing gel electrophoresis, diluted to ≈1 mg/mL and dialyzed (20 mM Tris-HCl at pH 7.0, 250 mM NaCl, 10% glycerol, and 1 mM DTT). Purified protein for structural analysis was prepared as described above except samples were diluted to ≈0.25 mg/mL, dialyzed against buffer without glycerol, stored on ice at 4 °C, and used within 24 h of infected cell harvest.

**Single-Particle Electron Microscopy Image Collection.** Images were collected on a Tecnai T12 electron microscope (FEI) equipped with an LaB<sub>6</sub> filament and operated at an acceleration voltage of 120 kV. Images were recorded on imaging plates at a magnification of 67,000× and a defocus of approximately −1.5 μm by using low-dose procedures. Imaging plates were read out with a scanner (DITABIS) by using a step size of 15 μm, a gain setting of 20,000 and a laser power setting of 30%; 2 × 2 pixels were averaged to yield a pixel size of 4.5 Å at the specimen level (1).

**RNA Probe Preparation.** A pGEM9z (Promega) transcript was generated by Sp6 (NEB) run-off transcription from Sall-linearized plasmid. RNA visualized by UV shadowing was excised from a 15% polyacrylamide-urea gel. RNA was eluted from the

crushed fragment in 0.3 M NaOAc (pH 5.2) at 4 °C, extracted with phenol-chloroform, and was ethanol precipitated at −20 °C with carrier glycogen. A 7-nt 3′ RNA probe was prepared by T7 (NEB) transcription using an annealed DNA duplex (5′ TAA-TACGACTCACTATAG 3′ and 5′ mCmGCACAGCCCTA-TAGTGAGTCGTATTA 3′) with 2′-O methylated 5′ terminal nucleotides to promote accurate termination (2). The resulting 10-nt RNA was purified from a 20% polyacrylamide-urea gel as above. Before labeling, the 5′ triphosphate from T7 synthesized RNA probes was removed by treatment with Antarctic Phosphatase (NEB) for 30 min at 37 °C then 65 °C for 10 min.

**MACV Replicon Construction.** Plasmid pL was created by cloning L into pGEM3 (Promega). Replicon pMcm was prepared by using the backbone vector 2,0 (3). Noncoding S segment sequences were generated by overlap-extension PCR and appended to the NP and eGFP ORFs. A truncated T7 promoter with a single guanosine nucleotide flanks the 5′ end and a nonviral cytosine nucleotide followed by the HDV ribozyme sequence and T7 terminator on the 3′ end. Mutant pL and pMcm plasmids were generated by QuikChange site-directed mutagenesis (Stratagene).

**In Cell Replicon RNA Synthesis.** Confluent 6-cm dishes with 2 × 10<sup>6</sup> BSR-T7 cells were infected at an MOI of 3 with vaccinia-T7 (4). After 1 h, cells were washed and overlaid with 1.5 mL of OptiMEM including 20 μL of Lipofectamine 2000 (Invitrogen), 1 μg of pL, and 6 μg of pMcm plasmids. Cells were incubated at 37 °C for 5 h before medium was changed to DMEM supplemented with 2% FBS, 10 mM Hepes at pH 7.7, and Penicillin/Kanamycin/Streptomycin (100 units/mL; 20 μg/mL; 20 μg/mL), and cells were incubated at 34 °C for 24 h. Cells seeded on glass coverslips were washed with PBS, fixed with 10% paraformaldehyde, and mounted with AntiFade Pro (Invitrogen). Images were collected on a Zeiss Axioplan inverted fluorescent microscope.

1. Li Z, Hite RK, Cheng Y, Walz T (2010) Evaluation of imaging plates as recording medium for images of negatively stained single particles and electron diffraction patterns of two-dimensional crystals. *J Electron Microsc (Tokyo)* 59:53–63.
2. Kao C, Zheng M, Rüdisser S (1999) A simple and efficient method to reduce nontemplated nucleotide addition at the 3′ terminus of RNAs transcribed by T7 RNA polymerase. *RNA* 5:1268–1272.

3. Ball LA (1992) Cellular expression of a functional nodavirus RNA replicon from vaccinia virus vectors. *J Virol* 66:2335–2345.
4. Fuerst TR, Niles EG, Studier FW, Moss B (1986) Eukaryotic transient-expression system based on recombinant vaccinia virus that synthesizes bacteriophage T7 RNA polymerase. *Proc Natl Acad Sci USA* 83:8122–8126.

A

MACV L EM

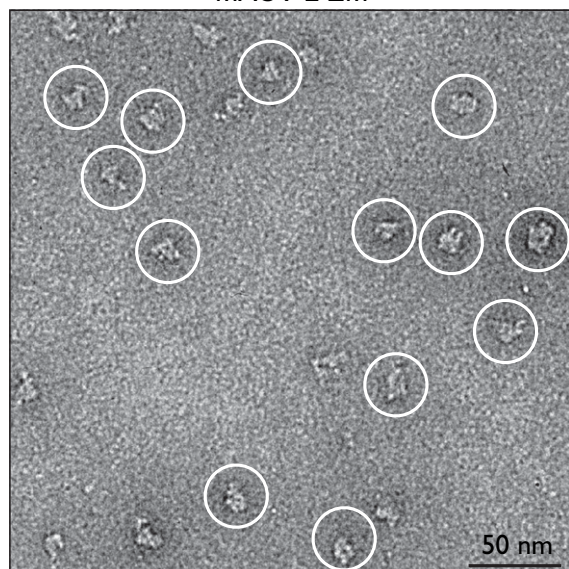

B

MACV L Class Averages

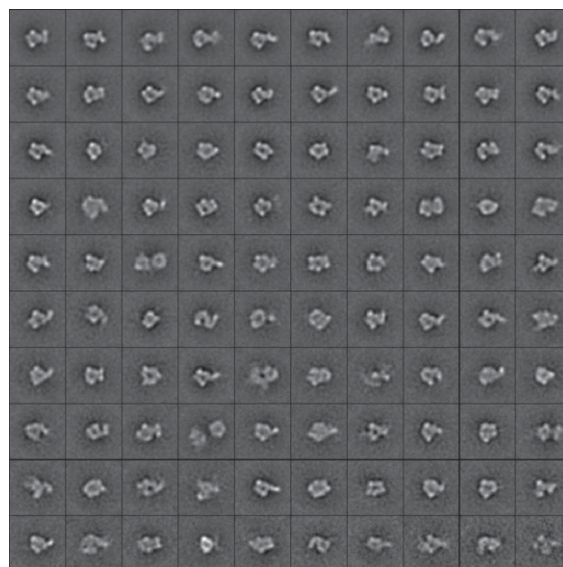

**Fig. S1.** (A) EM image of purified L in negative stain. (Scale bar: 50 nm.) (B) Class averages of negatively stained L obtained by classifying 8,871 particles into 100 classes. Class averages are arranged according to particle number such that the upper-left image represents the average with the most particles and the lower-right image contains the average with the least number of particles. Side length of the individual panels is 36 nm.



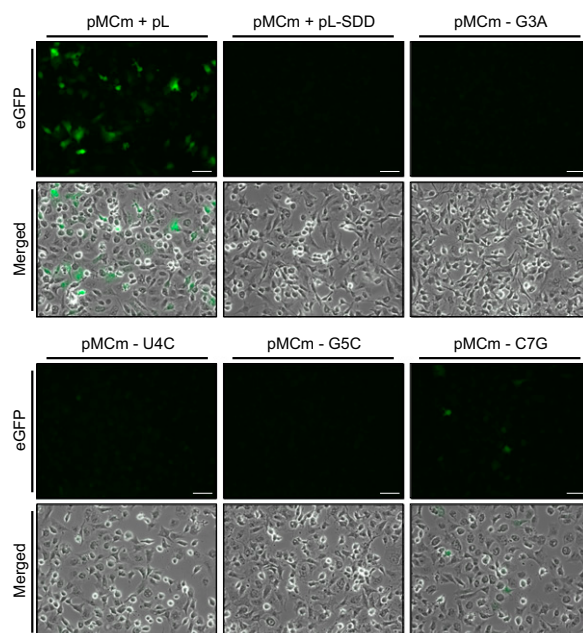

**Fig. S4.** RNA synthesis in cells correlates with L-RNA complex formation in vitro. Epifluorescence microscopy images of cells expressing the wt pMCm replicon (pMCm), replicons bearing mutations to the L 3' RNA binding site (pMCm G3A, U4C, G5C), or a replicon with a mutation to a downstream conserved position not involved in binding (pMCm C7G). Replicons were expressed with functional MACV L (pL) or a catalytically inactivated L (pL-SDD), and eGFP-positive cells represent the cells where efficient viral RNA synthesis has occurred. (Scale bars: 50  $\mu$ m.)

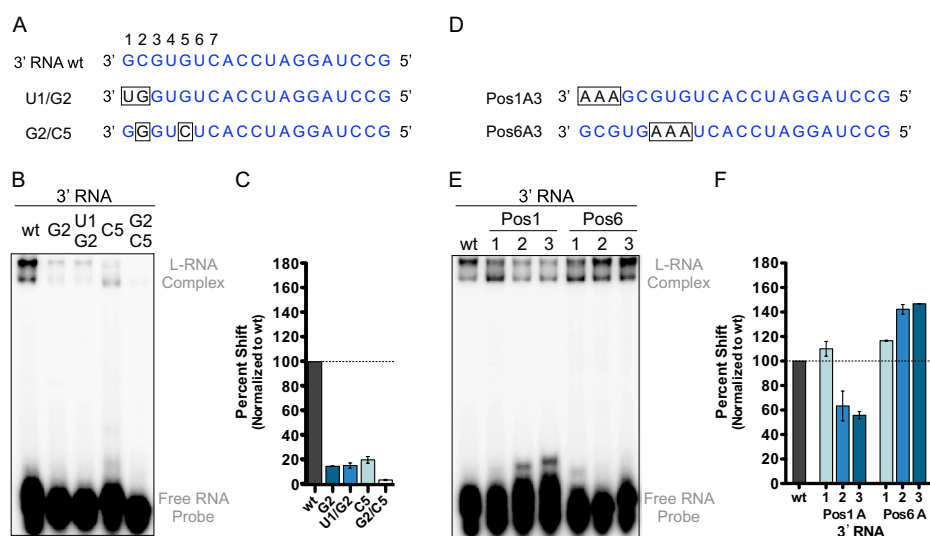

**Fig. S5.** Polymerase template recognition requires the correct positioning of the sequence element in relation to the 3' end. (A) RNA probes used to analyze potential secondary structures within the 3' terminus: 19-nt RNA corresponding to the 3' end of the 5 segment (3' RNA) as well as 3' RNA probes with paired mutations at positions 1 and 2 (3' RNA U1/G2) or positions 2 and 5 (3' RNA G2/C5). (B) The 3' RNA probes were labeled, incubated with purified L protein, and L-RNA complexes were separated and visualized as in Fig. 3B. (C) RNA binding was quantified and graphed as in Fig. 3C. (D) RNA probes depicting 3' RNA insertion sites used to analyze importance of binding motif proximity within the 3' terminus: 19-nt RNA corresponding to the 3' end of the 5 segment with adenosines inserted before position 1 (Pos1A1, 2, or 3) or adenosines inserted before position 6 (Pos6A1, 2, or 3). (E) Interaction with purified L was determined as in B. (F) Results are graphed as in C.

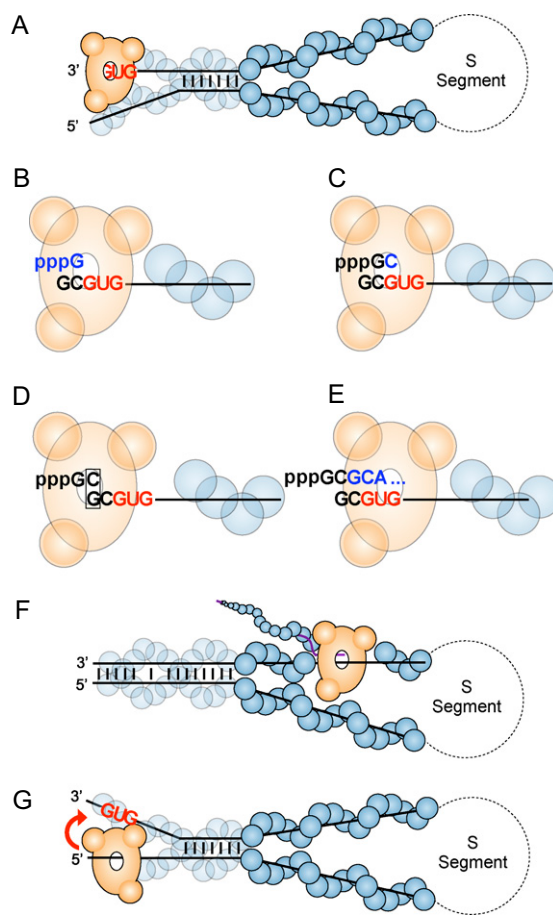

**Fig. S6.** Model of arenavirus RNA synthesis. (A) Cartoon diagram of the fully assembled arenavirus polymerase–template complex. (B) Recognition of the internal 3' RNA binding motif facilitates accurate internal RNA synthesis initiation at position 2 of the genomic RNA. (C and D) After formation of a pppGpC primer, the polymerase template complex realigns with the extreme genomic terminus to allow faithful copying of the entire viral segment. Although the events after initiation remain unknown (E), once the polymerase complex moves past the promoter, inter-termini dsRNA interactions could maintain the genomic termini in close proximity (F), and facilitate the eventual reengagement of L with its high affinity 3' RNA binding site and initiate a new round of RNA synthesis (G).
